# Supplementary material for: Genome-Wide Association Study of Seed Dormancy and the Genomic Consequences of Improvement Footprints in Rice (Oryza sativa L.)
Source: Front Plant Sci. 2018 Jan 5;8:2213. doi: 10.3389/fpls.2017.02213 (PMC5760558; doi:10.3389/fpls.2017.02213)
Supplement: Supplementary file 8 [file Table8.XLSX]

## Sheet: Sheet1
Table S8. The detailed haplotype information of candidate gene LOC_Os03g10110 from RiceVarMap database.
Chromosome	chr03
SNP Position	'5115241,5115243,5115414,5115415,5115424,5115567,5115690,5116009,5116128,5116141,5116179,5116322,5116324,5116399,5116481,5116792,5116814,5116963,5117302,5117460,5117559,5117667,5117767,5117770,5118031,5118128,5118414,5118560,5118581,5118582,5118635,5118644,5118665,5118685
Haplotype Group	Haplotype	ALL Frequencies	Indica	Japonica	Intermediate	Aus	Cultivar Name
I	TATTGCCAATGCGAGGACGTCGCCGGCCGGATTGATGGACCTCACGT	522	510	1	11	0	C180;C182;C183;C184;C019;C190;C193;C194;C197;C201;C202;C021;C022;C024;C025;C030;C031;C036;C037;C039;C040;C041;C042;C043;C044;C045;C046;C047;C049;C050;C053;C055;C058;C059;C060;C062;C065;C066;C072;C073;C076;C077;C080;C081;C001;C102;C104;C009;C090;C091;C092;C094;C098;C099;C108;C109;C011;C112;C113;C117;C118;C121;C122;C124;C125;C127;C128;C129;C131;C135;C136;C139;C145;C147;C148;C151;C157;C158;C160;C162…
II	CGGAGCCGGTGCACGTGCGTAACTGGCCAGACAGATGGAGCTCGTAT	534	6	516	12	0	C181;C185;C186;C187;C188;C189;C195;C196;C002;C023;C026;C028;C029;C003;C032;C034;C035;C004;C048;C005;C051;C052;C054;C056;C057;C063;C064;C067;C070;C071;C074;C079;C082;C083;C084;C085;C087;C010;C101;C103;C106;C089;C093;C111;C116;C119;C012;C120;C123;C130;C133;C134;C137;C014;C146;C149;C150;C152;C153;C016;C017;C171;C172;C177;C179;C018;HP375;HP376;HP378;HP381;HP382;HP384;HP385;HP388;HP389;HP390;HP391;HP3…
III	TGGAGCCGGTGCGAGGACGTCGCCGGCCGGATTGGTGGACATCACGA	207	201	0	6	0	C191;C192;C198;C199;C200;C061;C068;C069;C078;C008;C100;C107;C088;C095;C096;C097;C110;C114;C132;C140;C141;C142;C143;C166;C175;HP380;HP383;HP386;HP394;HP410;HP417;HP419;HP42;HP422;HP423;HP427;HP430;HP434;HP440;HP445;HP448;HP450;HP455;HP458;HP471;HP476;HP481;HP484;HP497;HP502;HP509;HP516;HP517;HP528;HP529;HP531;HP546;HP547;HP553;HP555;HP559;HP571;HP572;HP573;HP575;HP576;HP577;HP578;HP579;HP580;HP581…
IV	TATTGCCAATGCGAGGACGTCGTCGGCCGGATTGATGGACCTCACGT	29	29	0	0	0	C020;C203;C027;C033;C038;C155;C156;C159;C161;HP393;HP443;HP453;HP463;HP504;HP505;HP506;HP999;HP164;HP192;HP235;HP244;HP276;HP300;HP301;HP316;W149;W322;GP132;GP60
V	TGGATCCGGTACGAGGACGTCGCCGGCCGGATTGATGGCCCTCACGT	82	29	3	10	40	C086;C169;HP180;HP358;W091;W094;W098;W099;W105;W106;W115;W129;W131;W134;W135;W140;W179;W211;W215;W219;W239;W245;W252;W255;W256;W277;W278;W279;W287;W015;W020;W296;W306;W330;W025;W028;W034;W048;W049;W069;W072;W073;W075;W077;W081;W084;GP1;GP101;GP104;GP108;GP116;GP121;GP124;GP135;GP138;GP14;GP140;GP22;GP23;GP24;GP25;GP34;GP37;GP38;GP512;GP530;GP531;GP533;GP576;GP589;GP622;GP63;GP67;GP679;GP681;GP69;…
VI	TGGATCCGGTACGAGGACGTCGCCGGCCGGATTGATGGCCCNNACGT	12	2	0	1	9	W103;W104;W108;W214;W220;W280;GP142;GP15;GP36;GP542;GP61;GP625
Cultivar Name: All the accessions were from RiceVarMap database (http://ricevarmap.ncpgr.cn/)
